# Supplementary material for: Circulating mRNA Profiling in Esophageal Squamous Cell Carcinoma Identifies FAM84B As A Biomarker In Predicting Pathological Response to Neoadjuvant Chemoradiation
Source: PubMed Central journal article supplement (PMC4434848; doi:10.1038/srep10291), 2015-05-18
Supplement: srep10291-s1.pdf [file srep10291-s1.pdf]

## Manuscript Title

Circulating mRNA Profiling in Esophageal Squamous Cell Carcinoma Identifies FAM84B  
As A Biomaker In Predicting Pathological Response to Neoadjuvant Chemoradiation

**Authors:** Feng-Ming Hsu, Jason Chia-Hsien Cheng, Yih-Leong Chang, Jang-Ming Lee,  
Albert C. Koong, Eric Y. Chuang

**Supplementary Table e1.** David (Database for Annotation, Visualization, and Integrated Discovery) functional annotation clustering with differentially expressed genes before and after chemoradiation.

| Annotation Cluster 1 | Enrichment Score: 8.64                               |       |         |            |
|----------------------|------------------------------------------------------|-------|---------|------------|
| Category             | Term                                                 | Count | P Value | Bonferroni |
| GOTERM_BP_ALL        | GO:0002376~immune system process                     | 33    | 1.2E-14 | 1.3E-11    |
| GOTERM_BP_ALL        | GO:0006955~immune response                           | 24    | 7.2E-11 | 7.7E-8     |
| GOTERM_BP_ALL        | GO:0050896~response to stimulus                      | 34    | 1.4E-2  | 1.0E0      |
|                      |                                                      |       |         |            |
| Annotation Cluster 2 | Enrichment Score: 2.84                               |       |         |            |
| Category             | Term                                                 | Count | P Value | Bonferroni |
| GOTERM_BP_ALL        | GO:0048534~hemopoietic or lymphoid organ development | 10    | 5.3E-5  | 5.5E-2     |
| GOTERM_BP_ALL        | GO:0002520~immune system development                 | 10    | 8.4E-5  | 8.6E-2     |
| GOTERM_BP_ALL        | GO:0046649~lymphocyte activation                     | 8     | 3.4E-4  | 3.0E-1     |
| GOTERM_BP_ALL        | GO:0048872~homeostasis of number of cells            | 6     | 5.1E-4  | 4.2E-1     |
| GOTERM_BP_ALL        | GO:0030097~hemopoiesis                               | 8     | 9.3E-4  | 6.3E-1     |
| GOTERM_BP_ALL        | GO:0045321~leukocyte activation                      | 8     | 1.1E-3  | 6.9E-1     |
| GOTERM_BP_ALL        | GO:0042113~B cell activation                         | 5     | 1.6E-3  | 8.2E-1     |
| GOTERM_BP_ALL        | GO:0046651~lymphocyte proliferation                  | 4     | 2.6E-3  | 9.4E-1     |
| GOTERM_BP_ALL        | GO:0001775~cell activation                           | 8     | 2.9E-3  | 9.5E-1     |
| GOTERM_BP_ALL        | GO:0070661~leukocyte proliferation                   | 4     | 3.0E-3  | 9.6E-1     |

|                      |                                                                               |       |         |            |
|----------------------|-------------------------------------------------------------------------------|-------|---------|------------|
| GOTERM_BP_ALL        | GO:0032943~mononuclear cell proliferation                                     | 4     | 3.0E-3  | 9.6E-1     |
| GOTERM_BP_ALL        | GO:0042100~B cell proliferation                                               | 3     | 3.2E-3  | 9.7E-1     |
| GOTERM_BP_ALL        | GO:0048538~thymus development                                                 | 3     | 9.1E-3  | 1.0E0      |
| GOTERM_BP_ALL        | GO:0042110~T cell activation                                                  | 5     | 9.6E-3  | 1.0E0      |
| GOTERM_BP_ALL        | GO:0002521~leukocyte differentiation                                          | 5     | 1.1E-2  | 1.0E0      |
|                      |                                                                               |       |         |            |
| Annotation Cluster 3 | Enrichment Score: 2.61                                                        |       |         |            |
| Category             | Term                                                                          | Count | P Value | Bonferroni |
| GOTERM_BP_ALL        | GO:0002682~regulation of immune system process                                | 11    | 2.2E-4  | 2.1E-1     |
| GOTERM_BP_ALL        | GO:0050776~regulation of immune response                                      | 8     | 7.2E-4  | 5.4E-1     |
| GOTERM_BP_ALL        | GO:0002684~positive regulation of immune system process                       | 8     | 9.8E-4  | 6.5E-1     |
| GOTERM_BP_ALL        | GO:0002768~immune response-regulating cell surface receptor signaling pathway | 4     | 2.6E-3  | 9.4E-1     |
| GOTERM_BP_ALL        | GO:0050778~positive regulation of immune response                             | 6     | 2.7E-3  | 9.4E-1     |
| GOTERM_BP_ALL        | GO:0002253~activation of immune response                                      | 5     | 3.4E-3  | 9.7E-1     |
| GOTERM_BP_ALL        | GO:0048583~regulation of response to stimulus                                 | 10    | 3.5E-3  | 9.8E-1     |
| GOTERM_BP_ALL        | GO:0048584~positive regulation of response to stimulus                        | 7     | 4.7E-3  | 9.9E-1     |
| GOTERM_BP_ALL        | GO:0002764~immune response-regulating signal transduction                     | 4     | 6.0E-3  | 1.0E0      |
| GOTERM_BP_ALL        | GO:0050851~antigen receptor-mediated signaling pathway                        | 3     | 2.0E-2  | 1.0E0      |
|                      |                                                                               |       |         |            |
| Annotation Cluster 4 | Enrichment Score: 2.09                                                        |       |         |            |
| Category             | Term                                                                          | Count | P Value | Bonferroni |
| GOTERM_BP_ALL        | GO:0042440~pigment metabolic process                                          | 4     | 3.2E-3  | 9.7E-1     |
| GOTERM_BP_ALL        | GO:0006783~heme biosynthetic process                                          | 3     | 5.5E-3  | 1.0E0      |
| GOTERM_BP_ALL        | GO:0033014~tetrapyrrole biosynthetic process                                  | 3     | 7.6E-3  | 1.0E0      |
| GOTERM_BP_ALL        | GO:0006779~porphyrin biosynthetic process                                     | 3     | 7.6E-3  | 1.0E0      |
| GOTERM_BP_ALL        | GO:0042168~heme metabolic process                                             | 3     | 9.1E-3  | 1.0E0      |
| GOTERM_BP_ALL        | GO:0033013~tetrapyrrole metabolic process                                     | 3     | 1.6E-2  | 1.0E0      |
| GOTERM_BP_ALL        | GO:0006778~porphyrin metabolic process                                        | 3     | 1.6E-2  | 1.0E0      |
|                      |                                                                               |       |         |            |
| Annotation Cluster 5 | Enrichment Score: 1.96                                                        |       |         |            |
| Category             | Term                                                                          | Count | P Value | Bonferroni |
| GOTERM_BP_ALL        | GO:0006959~humoral immune response                                            | 5     | 1.8E-3  | 8.6E-1     |

|                   |                                                                  |    |        |       |
|-------------------|------------------------------------------------------------------|----|--------|-------|
| ALL               |                                                                  |    |        |       |
| GOTERM_BP_<br>ALL | GO:0006952~defense response                                      | 11 | 7.2E-3 | 1.0E0 |
| GOTERM_BP_<br>ALL | GO:0042592~homeostatic process                                   | 12 | 1.0E-2 | 1.0E0 |
| GOTERM_BP_<br>ALL | GO:0019725~cellular homeostasis                                  | 9  | 1.2E-2 | 1.0E0 |
| GOTERM_BP_<br>ALL | GO:0030005~cellular di-, tri-valent inorganic cation homeostasis | 6  | 1.7E-2 | 1.0E0 |
| GOTERM_BP_<br>ALL | GO:0006879~cellular iron ion homeostasis                         | 3  | 1.8E-2 | 1.0E0 |
| GOTERM_BP_<br>ALL | GO:0055066~di-, tri-valent inorganic cation homeostasis          | 6  | 2.1E-2 | 1.0E0 |
| GOTERM_BP_<br>ALL | GO:0055072~iron ion homeostasis                                  | 3  | 2.3E-2 | 1.0E0 |
